# Supplementary material for: Heterozygous expression of a Kcnt1 gain-of-function variant has differential effects on somatostatin- and parvalbumin-expressing cortical GABAergic neurons
Source: eLife. 2024 Oct 11;13:RP92915. doi: 10.7554/eLife.92915 (PMC11469685; doi:10.7554/eLife.92915)
Supplement: Figure 1—source data 1. [file elife-92915-fig1-data1.xlsx]

## Sheet: Glut Rin
WT	YH-HET
186	263
166	170
248	226
113	197
114	312
132	194
274	137
222	113
320	311
378	121
281	176
220	183
178	172
121	196
196	194
206	201
99	285
185	233
190	145
160	130
120	124
119	214
149	216
127	184
113	164
146	86
78	139
	142
	120
	218

## Sheet: Glut Rheo
WT	YH-HET
140	100
140	100
60	100
220	100
160	80
100	160
80	60
80	200
60	160
60	80
60	120
100	100
100	140
160	100
380	100
140	100
140	60
180	100
160	260
240	200
160	240
160	100
240	140
400	180
160	220
220	360
300	100
	200
	140
	200

## Sheet: Glut AP thresh
WT	YH-HET
-33.1	-29
-30.6	-31.1
-26	-32
-32	-28
-28	-29
-29	-33
-31.5	-39
-26.3	-25
-34.2	-23.5
-26	-29
-38.8	-26.5
-29.5	-25
-31	-22.6
-34.2	-26
-32	-24
-22	-26.7
-25.5	-32
-20	-29.9
-23	-8
-33.7	-23.5
-17	-31
-17.6	-42
-25.5	-20
-20	-13
-18	-17.3
-31	-17
-30	-30.5
	-21
	-45
	-25.5

## Sheet: Glut AP hw
WT	YH-HET
2.04	3
3.46	2.02
2.7	2.75
1.97	3.5
1.88	3.46
1.95	3.4
2.56	2.28
2.9	1.83
3.37	1.48
3.52	1.95
2.6	1.67
2.64	1.55
2.78	1.83
2.34	2.35
2.38	2.07
1.78	1.84
1.86	2.35
2.17	2.07
2.14	2.7
2.04	1.78
2.16	1.9
1.64	1.72
1.68	2.26
1.66	1.72
1.88	2.16
1.55	2.23
1.63	2.3
	2.07
	2.63
	1.93
	1.9
	2.15

## Sheet: Glut AHP
WT	YH-HET
15.3	10
12.8	14.2
15	11
20	14
13	12.5
11.5	8.4
9.4	9
12.5	13
7	16
10	12.5
10	7
14.4	9.6
13	18
10.5	10
14.2	13
11	10.5
9	15.5
16	7
11.3	14
12	10.8
4.4	11.3
8.6	17
16	5.2
10	10
9.4	16
11	13
	11
	14
	0
	10

## Sheet: FS GABA Rin
WT	YH-HET
96	66
58	170
145	81
114	92
76	141
103	86.3
135	72.5
94	136
126	41
45	55
37	75
70	64
90	82
76	102
71	110
116	213
66	72
95	194
86	88
91	50
123	147
126	95
110	149
128	102
107	92
139	151
53
81
44

## Sheet: FS GABA Rheo
WT	YH-HET
500	480
720	160
260	160
420	260
500	240
140	480
280	680
260	340
360	780
940	700
820	540
260	740
500	520
440	400
180	380
620	140
400	520
300	240
320	620
120	520
160	220
500	380
200	340
300	480
200	380
620	300
720
280

## Sheet: FS GABA AP thresh
WT	YH-HET
-35.5	-23.5
-27	-26
-22.2	-33
-21	-32
-26	-27
-31	-25.3
-17.8	-26
-25.8	-15.1
-26.7	-24.7
-15.2	-22
-16.6	-22
-19.7	-22
-24.5	-22
-16.6	-22.3
-28	-31
-19	-27
-28	-27
-25	-27
-24	-28
-32	-33
-23.5	-27.7
-28.2	-23
-17	-17
-19	-13.8
-21.6	-15
-19.7	-19.8
-20

## Sheet: FS GABA AP hw
WT	YH-HET
1	0.89
0.7	0.96
0.99	1.14
0.78	1.06
0.77	1.08
1.05	0.77
0.89	0.82
0.98	0.96
0.87	0.59
0.7	0.72
0.66	0.67
0.96	0.7
0.91	0.74
0.78	1.06
0.81	0.78
0.69	1.48
1.2	1.07
0.69	1
0.81	0.84
0.74	0.62
1.05	0.96
1.09	0.8
1.08	0.91
0.81	0.75
1	1.14
0.93	0.88
1.13
0.69
0.72
0.71
0.62

## Sheet: FS GABA AHP
WT	YH-HET
25.4	26.7
30.4	28.5
26	20.7
27.7	19
26	21.5
32.2	31
31.6	33
26.4	30.4
24.5	26.7
30.2	30
36.7	30
25.3	36
25.3	25
30	24.5
22	22
26	20.3
25	26
25	23
24	28
27	27
23	29.7
31	24.6
33	30
22	24.5
27	34
27
31

[truncated: 8 more sheets: NFS GABA Rin, NFS GABA Rheo, NFS GABA AP thresh, NFS GABA AP hw, NFS GABA AHP, Glut AP freq, FS GABA AP freq, NFS GABA AP freq]
