# Supplementary material for: Heterozygous expression of a Kcnt1 gain-of-function variant has differential effects on somatostatin- and parvalbumin-expressing cortical GABAergic neurons
Source: eLife. 2024 Oct 11;13:RP92915. doi: 10.7554/eLife.92915 (PMC11469685; doi:10.7554/eLife.92915)
Supplement: Figure 2—figure supplement 1—source data 1. [file elife-92915-fig2-figsupp1-data1.xlsx]

## Sheet: Glut bar graph
	WT			Het			WT			Hom
Voltage (mV)	Mean	SD	N	Mean	SD	N	Mean	SD	N	Mean	SD	N
+30	1.08	0.13	24	1.47	0.19	26	1.26	0.18	27	1.91	0.29	25
+40	1.34	0.16	24	1.76	0.23	26	1.42	0.19	27	2.24	0.3	25
+50	1.61	0.2	24	2.05	0.27	26	1.63	0.23	27	2.51	0.36	25

## Sheet: Glut line graph
	WT			Het			WT			Hom
Voltage (mV)	Mean	SD	N	Mean	SD	N	Mean	SD	N	Mean	SD	N
-80	0.00689	0.004784	24	0.01147	0.007403	26	-0.00181	0.002515	27	-0.00056	0.002219	25
-70	0.01253	0.005039	24	0.01044	0.007716	26	0.00069	0.003074	27	0.00087	0.00198	25
-60	0.01039	0.004872	24	0.00886	0.005529	26	-0.00051	0.002724	27	-7e-05	0.003226	25
-50	-0.00921	0.015724	24	0.00733	0.005256	26	-0.001446	0.0053435	27	-0.00139	0.003272	25
-40	-0.00254	0.008056	24	-0.00543	0.005113	26	-0.00859	0.006699	27	-0.00643	0.005092	25
-30	-0.04034	0.011614	24	-0.05214	0.006396	26	-0.03831	0.011384	27	-0.03815	0.007965	25
-20	-0.07934	0.010231	24	-0.0894	0.008711	26	-0.07294	0.011049	27	-0.06444	0.010819	25

## Sheet: FS GABA bar graph
	WT			Het			WT			Hom
Voltage (mV)	Mean	SD	N	Mean	SD	N	Mean	SD	N	Mean	SD	N
-10	0.03682	0.046214	15	0.07425	0.039004	19	0.09072	0.046885	17	0.35398	0.121463	17
0	0.23766	0.0741	15	0.26331	0.059013	19	0.3068	0.080246	17	0.61003	0.269221	17
10	0.45912	0.105678	15	0.52876	0.087723	19	0.60915	0.146382	17	0.99568	0.299346	17

## Sheet: FS GABA line graph
	WT			Het			WT			Hom
Voltage (mV)	Mean	SD	N	Mean	SD	N	Mean	SD	N	Mean	SD	N
-80	0.01632	0.00723	15	0.0094	0.005963	19	0.000548	0.004753	17	-0.00263	0.003385	17
-70	0.02198	0.009728	15	0.01064	0.004395	19	-0.00141	0.001727	17	-0.00384	0.003337	17
-60	0.01881	0.01032	15	0.01626	0.005337	19	0.0005	0.003436	17	0.0079	0.002758	17
-50	0.01032	0.012345	15	0.01393	0.004419	19	-0.00158	0.006355	17	0.01481	0.005545	17
-40	-0.0032	0.013684	15	0.00944	0.005998	19	-0.00736	0.009201	17	0.01888	0.011165	17
-30	-0.01674	0.017604	15	0.00203	0.011121	19	-0.00491	0.012408	17	0.02365	0.015109	17
-20	-0.03308	0.029378	15	0.00487	0.021453	19	-0.00058	0.021784	17	0.02018	0.026261	17

## Sheet: NFS GABA bar graph
	WT			Het			WT			Hom
Voltage (mV)	Mean	SD	N	Mean	SD	N	Mean	SD	N	Mean	SD	N
-10	0.03	0.028	18	0.142	0.045	15	0.04526	0.031326	22	0.2254	0.055733	19
0	0.223	0.046	18	0.401	0.108	15	0.26583	0.057613	22	0.51947	0.07427	19
+10	0.538	0.08	18	0.726	0.189	15	0.57317	0.10071	22	0.90941	0.137763	19

## Sheet: NFS GABA line graph
	WT			Het			WT			Hom
Voltage (mV)	Mean	SD	N	Mean	SD	N	Mean	SD	N	Mean	SD	N
-80	0.004	0.003	18	0.01	0.006	15	0.00051	0.003399	22	0.00306	0.00424	19
-70	0.002	0.003	18	0.012	0.005	15	-0.0018	0.00224	22	0.00642	0.003156	19
-60	0	0.004	18	0.015	0.005	15	-0.00492	0.003775	22	0.00962	0.003505	19
-50	-0.002	0.005	18	0.012	0.006	15	-0.00637	0.004179	22	0.01457	0.007079	19
-40	-0.014	0.01	18	0.002	0.007	15	-0.01988	0.012159	22	0.01785	0.009465	19
-30	-0.044	0.011	18	-0.014	0.012	15	-0.04856	0.013781	22	0.03222	0.019389	19
-20	-0.05	0.014	18	0.012	0.02	15	-0.04306	0.017171	22	0.09424	0.04307	19
