# Supplementary material for: Heterozygous expression of a Kcnt1 gain-of-function variant has differential effects on somatostatin- and parvalbumin-expressing cortical GABAergic neurons
Source: eLife. 2024 Oct 11;13:RP92915. doi: 10.7554/eLife.92915 (PMC11469685; doi:10.7554/eLife.92915)
Supplement: Figure 2—source data 1. [file elife-92915-fig2-data1.xlsx]

## Sheet: Glut KNa
	WT			YH-HET
Voltage (mV)	Mean	SEM	N	Mean	SEM	N
-80	0.00689	0.004784	24	0.01147	0.007403	26
-70	0.01253	0.005039	24	0.01044	0.007716	26
-60	0.01039	0.004872	24	0.00886	0.005529	26
-50	-0.00921	0.015724	24	0.00733	0.005256	26
-40	-0.00254	0.008056	24	-0.00543	0.005113	26
-30	-0.04034	0.011614	24	-0.05214	0.006396	26
-20	-0.07934	0.010231	24	-0.0894	0.008711	26
-10	-0.03326	0.017371	24	-0.0102	0.022608	26
0	0.17525	0.034759	24	0.27524	0.053897	26
10	0.50751	0.07536	24	0.72831	0.106121	26
20	0.80508	0.097533	24	1.1475	0.152269	26
30	1.07984	0.126554	24	1.4749	0.191096	26
40	1.34139	0.160081	24	1.75846	0.229942	26
50	1.61434	0.196883	24	2.04822	0.271793	26

## Sheet: FS GABA KNa
	WT			YH-HET
Voltage (mV)	Mean	SEM	N	Mean	SEM	N
-80	0.01632	0.00723	15	0.0094	0.005963	19
-70	0.02198	0.009728	15	0.01064	0.004395	19
-60	0.01881	0.01032	15	0.01626	0.005337	19
-50	0.01032	0.012345	15	0.01393	0.004419	19
-40	-0.0032	0.013684	15	0.00944	0.005998	19
-30	-0.01674	0.017604	15	0.00203	0.011121	19
-20	-0.03308	0.029378	15	0.00487	0.021453	19
-10	0.03682	0.046214	15	0.07425	0.039004	19
0	0.23766	0.0741	15	0.26331	0.059013	19
10	0.45912	0.105678	15	0.52876	0.087723	19
20	0.69551	0.13595	15	0.79687	0.126756	19
30	0.87151	0.165014	15	1.03062	0.154486	19
40	1.0593	0.198572	15	1.16943	0.17394	19
50	1.25993	0.228071	15	1.38871	0.209602	19

## Sheet: NFS GABA KNa
	WT			YH-HET
Voltage (mV)	Mean	SEM	N	Mean	SEM	N
-80	0.004	0.003	18	0.01	0.006	15
-70	0.002	0.003	18	0.012	0.005	15
-60	0	0.004	18	0.015	0.005	15
-50	-0.002	0.005	18	0.012	0.006	15
-40	-0.014	0.01	18	0.002	0.007	15
-30	-0.044	0.011	18	-0.014	0.012	15
-20	-0.05	0.014	18	0.012	0.02	15
-10	0.03	0.028	18	0.142	0.045	15
0	0.223	0.046	18	0.401	0.108	15
10	0.538	0.08	18	0.726	0.189	15
20	0.897	0.155	18	1.038	0.279	15
30	1.234	0.188	18	1.38	0.354	15
40	1.366	0.193	18	1.775	0.439	15
50	1.624	0.235	18	2.021	0.413	15
