# Supplementary material for: Heterozygous expression of a Kcnt1 gain-of-function variant has differential effects on somatostatin- and parvalbumin-expressing cortical GABAergic neurons
Source: eLife. 2024 Oct 11;13:RP92915. doi: 10.7554/eLife.92915 (PMC11469685; doi:10.7554/eLife.92915)
Supplement: Figure 3—source data 1. [file elife-92915-fig3-data1.xlsx]

## Sheet: eE onto E
evoked PSC amplitude (pA)*	WT	YH-HET
*graph values are on a log scale	10	9.9
	10	10
	18	15
	23	15
	26	16
	49	21
	50	31
	53	43
	69	55
	90	60
	98	60
	117	70
	123	93
	179	126
	207	138
	288	140
	562	176
	757	178
		220
		248
		457
		849
		2810

## Sheet: eI onto E
evoked PSC amplitude (pA)*	WT	YH-HET
*graph values are on a log scale	20	10
	21	18
	39	40
	58	48
	63	50
	70	61
	71	70
	71	80
	127	82
	145	112
	147	160
	170	180
	184	187
	190	235
	247	260
	265	298
	345	326
	356	546
	397	555
	455	563
	520	568
	870	614
	961	670
	1070	760
		923

## Sheet: eE onto I
evoked PSC amplitude (pA)*	WT	YH-HET
*graph values are on a log scale	10	21
	16	22
	24	27
	25	29
	31	35
	35	35
	43	43
	53	50
	74	54
	74	60
	84	77
	141	95
	176	170
	185	175
	194	265
	222	323
	222	375
	272	379
	291	481
	296	527
	340	661
	407	735
	510	1110
	889	1700
	1300	4400
	1320

## Sheet: eI onto I
evoked PSC amplitude (pA)*	WT	YH-HET
*graph values are on a log scale	7	22
	8	24
	21	42
	21.3	42
	30	55
	56	90
	70	100
	72	126
	98	159
	101	165
	123	190
	133	198
	144	215
	156	262
	165	300
	262	319
	276	380
	355	550
	380	562
	809
	1050

## Sheet: sE onto E
spontaneous PSCs (events/sec)	WT	YH-HET
	10.2407	1.5694
	3.2361	0.4556
	4.4306	1.1605
	3.4722	0.6778
	2.1746	0.3194
	5.1042	0.381
	1.8254	2.2963
	3.9012	1.1667
	5.0476	2.5476
	1.9167	16.7857
	4.0222	2.8444
	11.3333	1.4
	2.1235	24.5333
	15.8	2.75
	8.5833	1.4722
	3.75	8.4778
	8.2111	10.3611
	2.0667	1.0972
	2.6222	3.6049
	2.25	6.1429
	0.7917	0.5889
	4.9259	7.7778
	2	0.0333
	1.3333	1.0741
	4.25	18.8889
	1.25	1.7333
	0.75	0.5333
	5.7222	0.2813
	2.7143	0.3556
	4.2813	0.2
	26.0714	9.5926
	2.3194	5.1296
	0.9028	2.1111
	0.9722	2.8704
	0.9688	2
	4.9464	4.9259
	2.7937	17.8929
	0.5556	17.5714
	10.475	0.2778
	2.9375	2.875
	5.9167	5.4127
		1.2222
		0.625
		1.3333
		0.4028
		2.4464
		0.875

## Sheet: sI onto E
spontaneous PSCs (events/sec)	WT	YH-HET
	3.5778	5.0778
	6.6	2.8111
	1.1667	0.5333
	1.2111	3.0556
	6	0.4111
	4.9778	4.0111
	1.6778	6.7889
	3.7111	2.1111
	3.6111	1.7111
	4.0556	7.3
	7.7222	5.5
	1.4778	6.7889
	9.0778	6.9556
	5.0333	0.6556
	5.4778	6.9667
	9.1778	7.9556
	7.3778	5.8
	8.8667	6.95
	2.4778	3.2875
	4.4111	3.9111
	3.1667	0.5875
	3.9778	4.1111
	1.5125	1.925
	3.2125	2.5222
	2.275	1.8111
	1	2.1094
	2.1125	4.6032
	2.2111	3.5444
	2.3778	1.7
	2.7917	3.625
	4.6042	1.7381
	6.5156

## Sheet: sE onto I
spontaneous PSCs (events/sec)	WT	YH-HET
	15.3611	1.3333
	16.6042	9.8778
	23.1389	0.7556
	16.0938	5.7111
	5.7222	1.7917
	5.875	2.875
	14.2361	16.4938
	14.6389	2.8194
	23.7955	5.1667
	20.5778	3.4667
	3.5926	5.5444
	22.2222	2.1111
	17.3333	6.0667
	18.375	3.2099
	7.7407	16.2
	11.7778	3.1296
	26.5	4.6
	6.8958	6.825
	26.3929	6.2222
	16.7857	4.1667
	19.4815	9.45
	23.3214	17.0417
	18.642	5.0417
	7.6944	19.0741
	2.8571	23.925
	13.0556	9.1964
	9.4028	22.8214
	23.125	6.175
		13.025
		2.4198
		7.5
		3.6111
		10.4861
		4.125
		17.8958

## Sheet: sI onto I
spontaneous PSCs (events/sec)	WT	YH-HET
	3.4222	5.5222
	3.7	1.2889
	3.7444	1.9667
	7.7	4.6333
	8.5	2.3
	3.0556	1.0333
	1.1389	2.4222
	5.1667	4.0667
	5.1111	2.9889
	2.7333	5.4444
	2.8889	2.6
	4.3667	5.1333
	2.9625	3.6667
	1.9	5.475
	2.8889	1.2125
	5.4	0.9219
	3.7292	0.9778
		1.3
		4.2625
		1.8333
		3.4286
		1.3444
		1.5778
		2.4286
		2.381

## Sheet: EI ratio
onto E		onto I
WT	YH-HET	WT	YH-HET
0.331	0.032	0.484	0.019
0.081	0.031	0.391	0.627
0.463	0.303	0.411	0.09
0.196	0.033	0.382	0.249
0.06	0.039	0.116	0.081
0.027	0.011	0.619	0.306
0.15	0.164	0.286	0.196
0.138	0.621	0.2	0.175
0.049	0.071	0.327	0.061
0.097	0.03	0.265	0.146
0.125	0.114	0.658	0.215
0.074	0.01		0.416
0.118	0.094		0.133
0.221	0.007		0.626
0.057	0.216		0.427
0.055	0.024		0.253
0.017	0.015		0.279
0.021	0.237		0.331
0.098	0.444		0.705
0.022	0.053		0.207
0.03	0.017		0.7
0.095	0.036
0.12	0.029
0.171	0.065
0.039	0.058
0.298
0.117
0.117
