# Supplementary material for: Heterozygous expression of a Kcnt1 gain-of-function variant has differential effects on somatostatin- and parvalbumin-expressing cortical GABAergic neurons
Source: eLife. 2024 Oct 11;13:RP92915. doi: 10.7554/eLife.92915 (PMC11469685; doi:10.7554/eLife.92915)
Supplement: Figure 4—figure supplement 1—source data 1. [file elife-92915-fig4-figsupp1-data1.xlsx]

## Sheet: cIN Rin
VIP	SST	PV
239.1	336	31.1
249	273.1	59.1
177.7	96	82.5
207	93	82.2
174	60	58.8
213.6	157.5	37.1
158.4	149.3	57.6
146.6	165.4	76.8
352.9	97	133.2
476.8	154.2	80.5
204.7	298.8	60
180.5	87.1	86.8
287.5	172	84.4
278.5	83	44
231.4	91.9	54
373.4	268.9	45.4
271.5	139.2	43.1
253.4	122.8	52.6
170	286.5	77.1
242.8	107.6	124.2
284.9	116.7	46.9
316.1	88	56.7
357.7	130	68.3
254.6	80
143.1	97
152.9	96
246	302.1
234.1	247
239.9	84.7
306.9	210.8
279.1	160.2
283.1	126.1
209.4	187.5
236.8	91
302.7	83.5
233.4	103.3
331	106.7
308.3	74.1
265.6	107.4
302.2	58
204.9	120.3
160.2	82.2
142.4	60.8
181.7	65.1
135.2	44.7
335.6
251.4
204.9
200.3
146.6

## Sheet: cIN Rheo
VIP	SST	PV
180	40	600
160	60	480
180	140	360
160	260	280
180	280	540
160	40	700
200	120	500
180	80	420
80	140	420
50	200	420
280	80	680
120	220	380
125	160	400
150	340	780
180	220	720
80	80	920
120	180	720
300	180	480
300	80	620
160	280	280
120	180	620
100	210	400
40	175	740
100	425
160	200
100	275
140	80
100	80
60	240
60	80
60	160
100	180
80	120
140	220
120	280
100	360
280	320
160	500
140	180
60	580
120	200
140	280
160	420
100	440
260	560
80
240
160
160
260

## Sheet: cIN AP thresh
VIP	SST	PV
-33.5	-38.3	-40.4
-30.2	-37.7	-38.2
-34.7	-38.1	-32.5
-31.5	-35.5	-31.9
-30.2	-36.8	-42.2
-26.3	-45.7	-41.85
-29.5	-34.1	-43.1
-26.4	-38.1	-36.7
-33.8	-39.4	-25.4
-28.1	-31.9	-27.4
-34.8	-39.4	-23.8
-32.5	-39.7	-29.9
-33.3	-33.8	-37.4
-33.6	-37.9	-31.5
-30.3	-40.3	-29.7
-21.7	-40	-24.2
-29.9	-37.4	-31.6
-21.5	-34.5	-37.9
-29.4	-33.8	-36.6
-29.2	-35.8	-33.8
-30.1	-38.6	-33.3
-36.9	-45.1	-32.2
-33.3	-36.3	-34.3
-26.6	-33.1
-32	-33.8
-36.1	-33.6
-30.4	-36.8
-35.9	-38
-33.9	-38.4
-30.5	-36.7
-38.3	-35.5
-33.7	-35.6
-34.3	-41.9
-35.4	-36.4
-33.2	-36.2
-30.2	-28.8
-34	-31.2
-25.4	-31.9
-31.3	-35.7
-26.8	-34.5
-30.4	-29.3
-27.1	-38.1
-30.8	-35.7
-29.5	-35.9
-30.9	-36.2
-26.2
-33
-25.5
-29
-27.3

## Sheet: cIN AP hw
VIP	SST	PV
0.988	0.953	0.899
1.05	1.15	0.765
1.1	1.29	0.956
1.19	0.688	0.797
0.932	0.761	0.638
1.43	0.858	0.459
0.937	0.709	0.75
0.871	0.934	0.83
0.897	0.831	0.829
1.04	1.04	0.767
0.865	0.803	0.771
1.99	0.926	0.778
1	1.25	0.904
1.13	0.777	0.614
0.996	0.754	0.622
1.33	0.8	0.688
1.26	0.889	0.698
1.27	0.848	0.704
0.988	1.5	0.575
1.59	0.853	0.915
1.31	1.05	0.601
0.919	1.03	0.768
1.08	0.835	0.545
1.69	0.781
0.826	0.709
0.927	0.796
1.05	1.21
1.44	0.851
1.34	0.962
1.18	0.895
0.903	0.832
0.83	0.591
1.25	0.921
0.817	1.06
1.07	0.989
0.831	1.01
1.21	0.967
0.868	0.66
0.951	0.928
1.52	0.834
0.873	0.981
1.12	0.852
0.898	0.847
1.07	0.773
0.683	0.762
1.3
0.972
1.06
0.948
0.981

## Sheet: cIN AHP
VIP	SST	PV
14.1	26	27.8
15.6	22	25.4
15.4	25.5	25.9
15.9	31.1	22.5
17.7	29.6	26.2
15.3	32.8	24.4
17.6	32.1	27
18.4	30.1	26.5
21.9	33.4	30.8
20.5	24.5	26.5
13.9	21.8	30.1
7.7	21.1	26.2
18.6	16.9	20.6
11	25.5	26
18.7	20.8	23.8
15.7	19.2	31.5
12.1	21.5	24
19.9	17.8	26
17.2	16.1	28.5
12.6	19	26
15.1	18.9	28
18.9	15.9	30.4
15.8	23.6	26.2
18.5	28.7
18.2	27.1
16.4	22.8
17.6	18.5
10.4	21.9
13.9	19.6
22.1	19
20.5	19
19	28.4
20.1	26.1
21.9	20.4
15.8	18
19.7	25.1
14.7	20.4
15.7	26.9
17.7	21.5
12.9	19.9
18	20.2
20.8	20.8
16.2	21.2
20.1	24.9
22.2	20.8
15.6
19.8
17.4
19.2
19.8
