# Supplementary material for: Heterozygous expression of a Kcnt1 gain-of-function variant has differential effects on somatostatin- and parvalbumin-expressing cortical GABAergic neurons
Source: eLife. 2024 Oct 11;13:RP92915. doi: 10.7554/eLife.92915 (PMC11469685; doi:10.7554/eLife.92915)
Supplement: Figure 4—figure supplement 2—source data 1. [file elife-92915-fig4-figsupp2-data1.xlsx]

## Sheet: SST soma size
WT	YH-HET
222.3	306.4
201.4	226.4
230.3	568.4
112.8	292
224.9	236
332.4	691.9
306.4	401.6
220	448.2
248.4	588
325.7	518.1
439.4	356.6
221.6	414.3
251	447.3
286	420.5
529.8	340.7
379.3	241.8
142.3	464.5
412	283.3
300.4	540.3
207	278.2
376.9	599.7
506.733	195.3
277.804	279.5
355.468	233.2
665.196	618.2
504.528	513
603.436	75.226
432.087	559.903
241.003	564.662
165.08	847.69
100.65	304.504
344.904	332.946
662.526	241.119
497.562	721.964
246.808	347.69
392.269	334.223
411.888	385.419
362.666	168.911
440.214	418.969
345.484	527.513
192.129	356.281
509.287	304.853
470.978	205.015
150.917	266.427
308.103	578.129
555.956	542.373
374.042	287.439
191.433	564.082
446.947	458.672
319.596	409.914
472.139	302.066
378.918	700.952
295.217	635.826
572.324	789.181
389.715	423.265
707.337	656.838
397.26	673.787
384.49	229.046
451.126	415.951
480.613	313.211
332.134	723.125
617.716	735.663
252.148	552.241
249.245	233.109
172.974	210.471
769.329	349.431
501.974	541.909
542.489	786.278
458.556
774.669
421.291
149.988
176.457
418.621
491.526
677.734
282.679
389.831
412.236
397.028
462.039
