# Supplementary material for: Heterozygous expression of a Kcnt1 gain-of-function variant has differential effects on somatostatin- and parvalbumin-expressing cortical GABAergic neurons
Source: eLife. 2024 Oct 11;13:RP92915. doi: 10.7554/eLife.92915 (PMC11469685; doi:10.7554/eLife.92915)
Supplement: Figure 4—figure supplement 3—source data 1. [file elife-92915-fig4-figsupp3-data1.xlsx]

## Sheet: Vrest
	Before-after values																AVG
22 C	-56.8	-62.59	-54.07	-62.37	-51.33	-53.92	-58.42	-61.63	-57.2	-59.65	-52.07	-52.22	-59.28	-66.69	-52.03	-62.26	-57.66
35 C	-54.58	-57.87	-55.9	-65.55	-49.42	-57.15	-59.82	-62.21	-56.47	-64.91	-53.25	-50.63	-59.49	-65.01	-48.07	-61.45	-57.61

## Sheet: Rin
	Before-after values																AVG
22 C	44.8	181.7	217.2	50.6	39.9	227.9	123.7	44	23.6	165.5	54.2	158.1	25.2	58.4	138.7	45.4	99.93
35 C	26.6	118.3	121.5	35.8	22.9	117.6	66.5	44.8	17	82.5	42.4	98.6	13.5	42.6	107.7	31	61.83

## Sheet: Tau
	Before-after values																AVG
22 C	4.28	44.72	45.91	11.38	5.83	47.91	17.57	6.04	4.56	33.16	3.84	11.67	3.04	12.33	24.7	9.37	17.89
35 C	3.92	25.74	21.33	7.11	5.24	24.55	10.03	3.96	3.26	20.27	1.29	10.56	2.66	9.36	22.54	5.8	11.1

## Sheet: Cm
	Before-after values																AVG
22 C	95.54	246.12	211.37	224.9	146.12	210.22	142.04	137.27	193.22	200.36	70.85	73.81	120.63	211.13	178.08	206.39	166.75
35 C	147.37	217.58	175.56	198.6	228.82	208.76	150.83	88.39	191.76	245.7	30.42	107.1	197.04	219.72	209.29	187.1	175.25

## Sheet: Rheo
	Before-after values																AVG
22 C	500	140	100	550	650	100	200	450	1000	100	500	650	950	450	150	750	452.5
35 C	1400	240	300	950	1400	350	400	1150	2250	400	1350	1000	1600	600	150	1400	933.75

## Sheet: AP thresh
	Before-after values																AVG
22 C	-36.6	-31	-24.7	-35.9	-26.7	-34.3	-31.7		-33.1	-34.7		-25.2	-36.9	-39.2	-23.7	-29.6	-30.91
35 C	-33.5	-23	-11.2	-30.4	-20.8	-27.7	-26.9		-35.3	-31.1		-16.8	-36	-34	-20.6	-24.6	-25.06

## Sheet: AP amp
	Before-after values																AVG
22 C	78.9	81.3	83.2	79	84.5	80.6	88.6		75.7	87.6	68.3	74.4	76	90.5	85.7	76.3	80.71
35 C	69.8	66.7	62.2	62.9	71.5	60.7	79.1		61	80.4	43.6	54.4	65.2	79.1	77.4	57.7	66.11

## Sheet: AHP
	Before-after values																AVG
22 C	-20.2	-24	-6.84	-31.6	-30.4	-12.5	-8.94		-30.1	-9.46	-40.7	-20.4	-26.7	-13.9	-26.9	-41.3	-22.93
35 C	-26.5	-35.1	-5.37	-44.2	-36.1	-20	-17.2		-35.9	-9.31	-47.6	-23	-31.4	-17.1	-35.9	-47.1	-28.79

## Sheet: AP hw
	Before-after values																AVG
22 C	0.997	2.36	2.48	0.855	0.758	2.19	1.76		0.806	1.96	0.941	1.46	0.756	1.35	2.36	0.889	1.46
35 C	0.389	1.3	1.5	0.421	0.37	1.35	0.976		0.385	1.03	0.459	0.803	0.389	0.747	1.37	0.437	0.8

## Sheet: AP MFR
	Before-after values																AVG
22 C	26	26	58	76	18	26				40	14	58	36	18	52		37.33
35 C	46	42	94	102	28	42				54	30	102	76	38	88		61.83

[truncated: 3 more sheets: PV Rheo, PV AP amp, PV MFR]
