# Supplementary material for: Heterozygous expression of a Kcnt1 gain-of-function variant has differential effects on somatostatin- and parvalbumin-expressing cortical GABAergic neurons
Source: eLife. 2024 Oct 11;13:RP92915. doi: 10.7554/eLife.92915 (PMC11469685; doi:10.7554/eLife.92915)
Supplement: Figure 4—source data 1. [file elife-92915-fig4-data1.xlsx]

## Sheet: VIP Rin
WT	YH-HET
239.1	224.1
249	204.4
177.7	286.7
207	173.2
174	384.5
213.6	311.4
158.4	176
146.6	209.2
352.9	334.1
476.8	386.5
204.7	215.4
180.5	201.6
287.5	284.6
278.5	416.33
231.4	201.4
373.4	315.9
271.5	183.1
253.4	250.1
170	322.4
242.8	152.4
284.9	302
316.1	245.9
357.7	246.7
254.6	294.4
143.1	241.8
152.9	296.4
246	312.7
234.1	232.3
239.9	225.3
306.9	271.6
279.1	219.4
283.1	263.3
209.4	146.6
236.8	286.2
302.7	236.6
233.4	173.9
331	285.7
308.3	171.8
265.6	185.2
302.2	269.3
204.9	115
160.2	199.3
142.4	249.2
181.7	248.4
135.2	307
335.6	213.6
251.4	235.9
204.9	245
200.3
146.6

## Sheet: VIP Rheo
WT	YH-HET
180	180
160	160
180	220
160	340
180	80
160	200
200	240
180	240
80	200
50	40
280	125
120	240
125	175
150	75
180	200
80	80
120	120
300	360
300	140
160	320
120	300
100	120
40	140
100	140
160	140
100	160
140	160
100	100
60	100
60	120
60	60
100	80
80	180
140	200
120	120
100	140
280	100
160	120
140	200
60	60
120	180
140	160
160	120
100	140
260	80
80	120
240	180
160	120
160
260

## Sheet: VIP AP thresh
WT	YH-HET
-33.5	-31
-30.2	-29.4
-34.7	-31.6
-31.5	-32.9
-30.2	-27.5
-26.3	-29.8
-29.5	-29.5
-26.4	-24.7
-33.8	-33
-28.1	-34.6
-34.8	-35.1
-32.5	-28.8
-33.3	-33.5
-33.6	-29.8
-30.3	-31.1
-21.7	-32.8
-29.9	-31
-21.5	-30.4
-29.4	-25.6
-29.2	-20.4
-30.1	-37
-36.9	-32.4
-33.3	-34.1
-26.6	-29.8
-32	-35.1
-36.1	-36.5
-30.4	-33.5
-35.9	-31.1
-33.9	-30
-30.5	-31.9
-38.3	-33.1
-33.7	-33.4
-34.3	-33.8
-35.4	-34.7
-33.2	-28.9
-30.2	-30.2
-34	-32.5
-25.4	-32
-31.3	-24.8
-26.8	-34.8
-30.4	-28.6
-27.1	-30.4
-30.8	-32.8
-29.5	-32
-30.9	-29
-26.2	-29
-33	-25.1
-25.5	-25.6
-29
-27.3

## Sheet: VIP AP hw
WT	YH-HET
0.988	1.02
1.05	1.09
1.1	0.866
1.19	0.87
0.932	1.47
1.43	1.09
0.937	0.981
0.871	1.12
0.897	0.868
1.04	1.69
0.865	1.38
1.99	0.976
1	1
1.13	1.23
0.996	1.01
1.33	1.33
1.26	1.21
1.27	0.919
0.988	1.15
1.59	1.07
1.31	1.09
0.919	1.06
1.08	1.55
1.69	1.05
0.826	0.818
0.927	0.865
1.05	1.08
1.44	0.922
1.34	1.28
1.18	0.648
0.903	1.3
0.83	0.987
1.25	1.48
0.817	0.817
1.07	1.07
0.831	1.46
1.21	1.21
0.868	1.55
0.951	0.839
1.52	1.05
0.873	0.812
1.12	1.21
0.898	1.11
1.07	0.946
0.683	0.815
1.3	0.952
0.972	0.907
1.06	1.09
0.948
0.981

## Sheet: VIP AHP
WT	YH-HET
14.1	15.2
15.6	16.9
15.4	16.8
15.9	17.4
17.7	11.7
15.3	13.7
17.6	15.4
18.4	17.5
21.9	16.7
20.5	11
13.9	11.2
7.7	17.6
18.6	18.2
11	16.1
18.7	16.9
15.7	12.3
12.1	16.3
19.9	14.6
17.2	17.4
12.6	22.1
15.1	12.9
18.9	17.5
15.8	26.9
18.5	13.9
18.2	16.9
16.4	17.7
17.6	15.2
10.4	20.5
13.9	19.6
22.1	23.7
20.5	22.4
19	20.9
20.1	17.7
21.9	20.2
15.8	15.3
19.7	24.5
14.7	15
15.7	12.9
17.7	16.4
12.9	14.7
18	20.1
20.8	16.6
16.2	16.8
20.1	16.5
22.2	19.4
15.6	17
19.8	18
17.4	22.5
19.2
19.8

## Sheet: SST Rin
WT	YH-HET
336	136.6
273.1	98.2
96	160.8
93	66.6
60	87.1
157.5	125.5
149.3	103.5
165.4	226.9
97	105.8
154.2	126.8
298.8	135.6
87.1	75.8
172	61.1
83	99.3
91.9	148.5
268.9	113
139.2	61.7
122.8	280.2
286.5	84.9
107.6	90.5
116.7	120.3
88	80.7
130	62.6
80	60.3
97	89
96	54.1
302.1	76.8
247	79.5
84.7	120.9
210.8	102.5
160.2	179.1
126.1	46
187.5	104.8
91	63.2
83.5	80.3
103.3	75.9
106.7	55.3
74.1	74.9
107.4	130.2
58	53.1
120.3	65.8
82.2	63.4
60.8	50.8
65.1	52.7
44.7	51
	83.2

## Sheet: SST Rheo
WT	YH-HET
40	220
60	200
140	220
260	560
280	280
40	300
120	160
80	80
140	220
200	100
80	160
220	400
160	360
340	180
220	80
80	180
180	280
180	80
80	500
280	220
180	200
210	160
175	320
425	520
200	280
275	420
80	420
80	460
240	120
80	300
160	160
180	460
120	240
220	380
280	360
360	220
320	400
500	300
180	160
580	840
200	260
280	500
420	640
440	360
560	520
	440

## Sheet: SST AP thresh
WT	YH-HET
-38.3	-33.3
-37.7	-38.6
-38.1	-28.5
-35.5	-33.8
-36.8	-36
-45.7	-34.8
-34.1	-37.5
-38.1	-37.7
-39.4	-35
-31.9	-40.1
-39.4	-36.6
-39.7	-32.1
-33.8	-38.2
-37.9	-42.3
-40.3	-38.3
-40	-36.8
-37.4	-38.1
-34.5	-33.9
-33.8	-33.5
-35.8	-40
-38.6	-39.7
-45.1	-39.3
-36.3	-38.5
-33.1	-40.1
-33.8	-35.6
-33.6	-33.6
-36.8	-32.4
-38	-36.2
-38.4	-38.1
-36.7	-34.6
-35.5	-26.4
-35.6	-35.2
-41.9	-35.2
-36.4	-36.4
-36.2	-30.4
-28.8	-36.1
-31.2	-34.3
-31.9	-29.1
-35.7	-37.9
-34.5	-33
-29.3	-35.9
-38.1	-32
-35.7	-32.4
-35.9	-36.2
-36.2	-31
	-31.2

## Sheet: SST AP hw
WT	YH-HET
0.953	0.76
1.15	0.814
1.29	0.953
0.688	0.885
0.761	0.886
0.858	0.732
0.709	0.846
0.934	1.36
0.831	0.776
1.04	0.769
0.803	0.78
0.926	0.861
1.25	1.03
0.777	0.939
0.754	0.82
0.8	0.874
0.889	0.864
0.848	1.2
1.5	0.541
0.853	0.973
1.05	0.789
1.03	0.774
0.835	0.906
0.781	0.717
0.709	0.929
0.796	0.728
1.21	0.817
0.851	0.758
0.962	1.04
0.895	1.05
0.832	1.11
0.591	0.81
0.921	0.694
1.06	0.808
0.989	0.83
1.01	0.962
0.967	0.987
0.66	0.775
0.928	0.811
0.834	0.861
0.981	0.857
0.852	0.828
0.847	0.593
0.773	0.755
0.762	0.685
	0.962

## Sheet: SST AHP
WT	YH-HET
26	31.5
22	20.2
25.5	25
31.1	23.4
29.6	25
32.8	25.3
32.1	17.8
30.1	21.5
33.4	23.3
24.5	25.6
21.8	26.6
21.1	21.8
16.9	26.1
25.5	18.8
20.8	31.8
19.2	24.7
21.5	23.4
17.8	21.4
16.1	27.1
19	18.9
18.9	20
15.9	23.1
23.6	26.9
28.7	26.1
27.1	17.2
22.8	22.4
18.5	19.7
21.9	22.9
19.6	17.9
19	19.7
19	21.2
28.4	30.2
26.1	35.2
20.4	21.9
18	27.6
25.1	18.3
20.4	18.9
26.9	27.1
21.5	19.8
19.9	22.2
20.2	23.5
20.8	25.4
21.2	27
24.9	25.7
20.8	20
	23.4

[truncated: 8 more sheets: PV Rin, PV Rheo, PV AP thresh, PV AP hw, PV AHP, VIP AP freq, SST AP freq, PV AP freq]
