# Supplementary material for: Heterozygous expression of a Kcnt1 gain-of-function variant has differential effects on somatostatin- and parvalbumin-expressing cortical GABAergic neurons
Source: eLife. 2024 Oct 11;13:RP92915. doi: 10.7554/eLife.92915 (PMC11469685; doi:10.7554/eLife.92915)
Supplement: Figure 5—figure supplement 1—source data 1. [file elife-92915-fig5-figsupp1-data1.xlsx]

## Sheet: VIP
	WT			YH-HET
Voltage (mv)	Mean	SEM	N	Mean	SEM	N
-80	-0.00234	0.003682	13	-0.00331	0.003143	14
-70	0.002	0.003342	13	-0.00045	0.00175	14
-60	0.00089	0.002587	13	0.00034	0.002299	14
-50	0.00251	0.003645	13	0.00194	0.001696	14
-40	-0.01299	0.008136	13	-0.0074	0.003074	14
-30	-0.03921	0.009701	13	-0.04483	0.007314	14
-20	-0.06483	0.014855	13	-0.07179	0.013668	14
-10	-0.03264	0.025362	13	-0.04204	0.01838	14
0	0.04348	0.042694	13	-0.01716	0.022802	14
10	0.14936	0.062367	13	0.13277	0.047213	14
20	0.2724	0.092314	13	0.36184	0.087292	14
30	0.3595	0.107509	13	0.55118	0.129702	14
40	0.48001	0.117292	13	0.65284	0.143709	14
50	0.54112	0.116579	13	0.79801	0.1644	14

## Sheet: SST
	WT			YH-HET
Voltage (mv)	Mean	SEM	N	Mean	SEM	N
-80	-0.00051	0.001744	25	0.00686	0.004457	26
-70	0.00462	0.004612	25	0.01773	0.006148	26
-60	0.00421	0.004889	25	0.03026	0.010198	26
-50	0.00306	0.003837	25	0.03418	0.015185	26
-40	-0.01138	0.005793	25	0.03157	0.021635	26
-30	-0.02156	0.008267	25	0.02471	0.026401	26
-20	0.02984	0.015274	25	0.0834	0.035022	26
-10	0.11767	0.026596	25	0.18603	0.043914	26
0	0.25375	0.044545	25	0.29503	0.057018	26
10	0.40436	0.067026	25	0.47501	0.079303	26
20	0.58259	0.096589	25	0.65598	0.10182	26
30	0.75684	0.131463	25	0.92636	0.132523	26
40	0.9046	0.155484	25	1.16634	0.165741	26
50	1.11345	0.181706	25	1.43324	0.207156	26

## Sheet: PV
	WT			YH-HET
Voltage (mv)	Mean	SEM	N	Mean	SEM	N
-80	-0.00057	0.003757	10	-0.00315	0.003777	11
-70	0.00773	0.003914	10	0.00927	0.00465	11
-60	0.01651	0.007129	10	0.0133	0.004895	11
-50	0.01452	0.014265	10	0.01367	0.008487	11
-40	0.01096	0.020655	10	0.00022	0.014401	11
-30	-0.01104	0.032253	10	-0.01522	0.018112	11
-20	-0.02464	0.043044	10	0.01547	0.028422	11
-10	0.07527	0.069189	10	0.12381	0.051499	11
0	0.23578	0.102106	10	0.30565	0.084036	11
10	0.48432	0.142121	10	0.52269	0.130982	11
20	0.73206	0.178717	10	0.80422	0.216767	11
30	1.0464	0.225485	10	1.16882	0.325756	11
40	1.3933	0.25585	10	1.44293	0.406363	11
50	1.70531	0.269677	10	1.73955	0.509004	11
