# Supplementary material for: Heterozygous expression of a Kcnt1 gain-of-function variant has differential effects on somatostatin- and parvalbumin-expressing cortical GABAergic neurons
Source: eLife. 2024 Oct 11;13:RP92915. doi: 10.7554/eLife.92915 (PMC11469685; doi:10.7554/eLife.92915)
Supplement: Figure 5—figure supplement 2—source data 1. [file elife-92915-fig5-figsupp2-data1.xlsx]

## Sheet: DKO KNa currents
Voltage (mV)	VU-sensitive							TTX-sensitive
-80	-0.00356478	-0.00551147	0	0.00381556	-0.023172	0.0127883	-0.000349624	-0.0215295	-0.0103164	0.00691137	0.00318443	0.000625097
-70	0.00109999	-0.00738363	-0.0372576	0.00247504	0.00786921	-0.00616837	-0.00157622	-0.0213615	-0.0145455	0.0162335	-0.00536116	0.010712
-60	0.00313559	0.00021255	-0.00374075	0.00206002	0.00509327	-2.344e-06	-0.000998472	-0.0298931	-0.0431487	0.0160445	-0.00569002	0.0219511
-50	-0.00260689	0.00205125	-0.0135245	0.00204013	-0.0285257	0.00668738	-0.0052415	-0.0707596	-0.126595	0.017289	0.0274272	0.0271133
-40	-0.00453625	-0.0122067	-0.00452163	0.00349189	0.0222745	0.0163475	-0.00534983	-0.150936	-0.196437	-0.0170467	-0.0435867	0.00511148
-30	-0.0101674	-0.00683424	0.00361669	-0.0375196	0.0131058	9.86525e-05	-0.0018469	-0.212765	-0.165934	-0.0715975	-0.0819074	-0.0765926
-20	0.00869851	0.0401922	0.0390356	-0.078885	0.0120068	-0.00485689	0.00456654	-0.203242	-0.190817	-0.104644	-0.280821	-0.190913
-10	0.045198	0.148619	0.165361	-0.135813	0.0504387	-0.0412837	0.043857	-0.0660592	-0.255125	-0.15984	-0.265811	-0.201976
0	0.153439	0.371178	0.333152	-0.124282	0.124663	0.0223343	0.0665231	0.0772718	-0.250733	-0.140421	0.0746216	-0.264024
10	0.452995	0.58404	0.55396	-0.159753	0.220982	0.0742909	0.106522	0.133402	0.109721	-0.161581	0.21659	-0.296579
20	0.753793	0.970408	0.786098	0.116387	0.292745	0.211026	0.159749	-0.233138	0.28857	-0.104195	0.273619	-0.17775
30	1.18858	1.12771	0.963456	0.189655	0.685388	0.436032	0.25355	0.137746	0.312608	-0.345814	0.29904	-0.0930642
40	1.40105	1.31043	1.26571	0.432628	0.840089	0.604945	0.326312	0.134348	0.451036	-0.230415	0.24679	-0.0697773
50	1.67929	1.615	1.44872	0.8621	0.836181	0.55481	0.442417	-0.325993	0.82513	-0.572877	0.43246	0.188483
