# Supplementary material for: Heterozygous expression of a Kcnt1 gain-of-function variant has differential effects on somatostatin- and parvalbumin-expressing cortical GABAergic neurons
Source: eLife. 2024 Oct 11;13:RP92915. doi: 10.7554/eLife.92915 (PMC11469685; doi:10.7554/eLife.92915)
Supplement: Figure 5—source data 1. [file elife-92915-fig5-data1.xlsx]

## Sheet: VIP
	WT			YH-HET
Voltage (mv)	Mean	SEM	N	Mean	SEM	N
-80	-0.00262	0.001583	12	0.00055	0.002355	14
-70	0.00297	0.00223	12	0.00131	0.001494	14
-60	0.00268	0.001835	12	4e-05	0.001605	14
-50	0.00534	0.003434	12	0.0021	0.001829	14
-40	0.0067	0.003596	12	0.0014	0.001035	14
-30	0.00751	0.008258	12	0.00676	0.006909	14
-20	0.03895	0.019822	12	0.05212	0.019622	14
-10	0.14421	0.047464	12	0.21585	0.046946	14
0	0.38124	0.101277	12	0.57632	0.098808	14
10	0.91681	0.255229	12	1.11148	0.163995	14
20	1.42823	0.375802	12	1.85166	0.264209	14
30	1.95748	0.468303	12	2.68991	0.372221	14
40	2.47549	0.54972	12	3.46475	0.454048	14
50	2.78793	0.584535	12	4.34626	0.482991	14

## Sheet: SST
	WT			YH-HET
Voltage (mv)	Mean	SEM	N	Mean	SEM	N
-80	-0.00252	0.002894	14	0.01379	0.004765	17
-70	0.00766	0.002841	14	0.0219	0.008388	17
-60	0.00938	0.003563	14	0.04272	0.012453	17
-50	0.02102	0.004695	14	0.08642	0.020744	17
-40	0.01675	0.006513	14	0.10049	0.025065	17
-30	0.04572	0.016608	14	0.14783	0.031246	17
-20	0.21776	0.057067	14	0.27811	0.053584	17
-10	0.52111	0.112504	14	0.62718	0.10731	17
0	0.95924	0.2071	14	1.27287	0.209935	17
10	1.44533	0.311489	14	2.02276	0.327458	17
20	1.89134	0.401669	14	2.83006	0.438008	17
30	2.40939	0.503985	14	3.57948	0.516816	17
40	3.11825	0.56623	14	4.42124	0.57189	17
50	3.52956	0.635788	14	5.16516	0.623814	17

## Sheet: PV
	WT			YH-HET
Voltage (mv)	Mean	SEM	N	Mean	SEM	N
-80	-0.00813	0.009078	12	0.01028	0.006324	13
-70	0.00439	0.005455	12	0.03399	0.007344	13
-60	0.01751	0.00539	12	0.05831	0.008924	13
-50	0.03451	0.008118	12	0.08088	0.00998	13
-40	0.07949	0.013057	12	0.10563	0.01281	13
-30	0.13497	0.02601	12	0.15475	0.020251	13
-20	0.26105	0.047192	12	0.30784	0.065306	13
-10	0.42613	0.073581	12	0.54984	0.105614	13
0	0.63897	0.108968	12	0.85391	0.151637	13
10	0.89103	0.151786	12	1.25407	0.224642	13
20	1.16119	0.198886	12	1.70689	0.343537	13
30	1.49967	0.257596	12	2.2197	0.353129	13
40	1.97794	0.335952	12	2.69327	0.447638	13
50	2.34257	0.394575	12	3.20933	0.552973	13
