# Supplementary material for: Heterozygous expression of a Kcnt1 gain-of-function variant has differential effects on somatostatin- and parvalbumin-expressing cortical GABAergic neurons
Source: eLife. 2024 Oct 11;13:RP92915. doi: 10.7554/eLife.92915 (PMC11469685; doi:10.7554/eLife.92915)
Supplement: Figure 6—figure supplement 1—source data 1. [file elife-92915-fig6-figsupp1-data1.xlsx]

## Sheet: Rin % change to 40
VIP 35 mM	VIP 30 mM
0	0
0	-0.302115
-0.41841	-1.04603
0	-1.17647
0	-0.78125
0	0
-0.452489	-1.35747
0	-0.3663
0	-0.847458
0	-0.460829
SST 35 mM	SST 30 mM
-3.80623	-13.1488
-15.0289	-23.1214
-1.82648	-8.21918
-2.25564	-9.77444
-6.45161	-16.129
-7.18391	-12.931
-2.23881	-3.73134
-7.75194	-15.5039
-1.78571	-2.97619
-2.71493	-8.1448
PV 35 mM	PV 30 mM
0	-1.51515
0	-2.68456
0	-3.9604
0	-0.900901
0	-1.21951
-0.826446	-2.47934
-0.862069	-3.44828
0	-2.0202
-1.16279	-3.48837
0	-1.5748
VIP GOF	SST GOF
0	-1.63043
-0.302115	-1.51057
-1.04603	-2.30126
-1.17647	-2.35294
-0.78125	-2.34375
0	-1.33779
-1.35747	-4.52489
-0.3663	-2.5641
-0.847458	-2.9661
-0.460829	-2.76498
Glut GOF	SST GOF
-0.641026	-3.20513
-1.20482	-5.42169
-0.793651	-7.14286
-0.775194	-6.20155
-1.63934	-4.91803
0	-2.82486
0	-8.59375
0	-4.30108
-0.645161	-5.80645
0	-4.27807

## Sheet: Rheo % change to 40
VIP 35 mM	VIP 30 mM
0	0
2.85714	7.14286
0	1.69492
0	1.04167
0	1.20482
0	1.36986
1.16279	3.48837
1.47059	4.41176
0	2.7027
0	0
SST 35 mM	SST 30 mM
33.3333	50
42.8571	60.7143
20	40
12.5	25
16.6667	33.3333
28.5714	60.7143
25	75
25	37.5
25	38.8889
9.09091	18.1818
10	30
16.6667	33.3333
PV 35 mM	PV 30 mM
1.69492	10.1695
4.25532	6.38298
3.44828	12.069
0	4.16667
3.57143	-1.78571
0	2
4	8
3.77358	5.66038
0	4
4.44444	6.66667
VIP GOF	SST GOF
0	11.1111
7.14286	14.2857
1.69492	10.1695
1.04167	7.29167
1.20482	7.22892
1.36986	9.58904
3.48837	13.9535
4.41176	10.2941
2.7027	9.45946
0	4.54545
Glut GOF	SST GOF
5.26316	42.1053
4.54545	40.9091
5.88235	23.5294
5	35
0	5.12821
4	12
5	30
5.55556	22.2222
3.57143	25
3.84615	30.7692

## Sheet: AP firing rate % change to 40
VIP 35 mM	VIP 30 mM
0	0
0	0
0	0
0	0
0	0
0	0
0	-14.2857
0	0
0	0
SST 35 mM	SST 30 mM
-14.2857	-28.5714
-95	-95
-6.66667	-13.3333
-18.1818	-54.5455
-34.6154	-50
-26.6667	-66.6667
-45.4545	-72.7273
-42.1053	-89.4737
-28.5714	-95.2381
-4.54545	-18.1818
PV 35 mM	PV 30 mM
-6.66667	-26.6667
-15	-65
0	-4.7619
-18.75	-43.75
-5.88235	-58.8235
-19.0476	-47.619
-9.09091	-54.5455
4	0
5.88235	0
-15.7895	-36.8421
VIP GOF	SST GOF
0	0
0	-25
0	-20
0	-14.2857
0	0
0	0
-14.2857	-14.2857
0	0
0	0
Glut GOF	SST GOF
0	0
0	0
0	0
0	-16.6667
0	-28.5714
0	-20
0	0
0	0
0	0
0	-20
0	0
