# Supplementary material for: Heterozygous expression of a Kcnt1 gain-of-function variant has differential effects on somatostatin- and parvalbumin-expressing cortical GABAergic neurons
Source: eLife. 2024 Oct 11;13:RP92915. doi: 10.7554/eLife.92915 (PMC11469685; doi:10.7554/eLife.92915)
Supplement: Figure 6—figure supplement 2—source data 1. [file elife-92915-fig6-figsupp2-data1.xlsx]

## Sheet: VIP AP freq
	VIP-Con			VIP-GOF			SST-GOF
Current (pA)	Mean	SEM	N	Mean	SEM	N	Mean	SEM	N
0	0	0	10	0	0	10	0	0	10
50	0	0	10	0	0	10	0	0	10
80	3.6	1.45449	10	3.2	1.40475	10	0.8	0.61101	10
90	6.6	1.57903	10	6	1.63299	10	2.6	1.11754	10
100	10.8	1.69181	10	10.2	1.69837	10	6.8	1.43604	10
110	13.2	1.37275	10	12.8	1.27192	10	10.2	1.47422	10
120	14	1.39841	10	14	1.33333	10	13	1.49815	10
140	16.6	1.68787	10	16.6	1.68787	10	15.2	1.74356	10
160	17.8	1.8	10	17.8	1.8	10	16.8	1.8427	10
180	19.6	2.16641	10	19.8	2.15922	10	18	2.06559	10
200	21.4	2.15097	10	20.8	2.1124	10	19.8	2.15922	10

## Sheet: VIP Rin
VIP-Con	VIP-GOF	SST-GOF
184	184	181
331	330	326
478	473	467
170	168	166
256	254	250
299	299	295
221	218	211
273	272	266
236	234	229
217	216	211

## Sheet: VIP Rheo
VIP-Con	VIP-GOF	SST-GOF
90	90	100
70	75	80
59	60	65
96	97	103
83	84	89
73	74	80
86	89	98
68	71	75
74	76	81
88	88	92

## Sheet: Glut AP freq
Current (pA)	Glut-Con											Glut-GOF											SST-GOF
0	0	0	0	0	0	0	0	0	0	0	0	0	0	0	0	0	0	0	0	0	0	0	0	0	0	0	0	0	0	0	0	0	0
50	0	0	0	0	0	0	0	0	0	0	0	0	0	0	0	0	0	0	0	0	0	0	0	0	0	0	0	0	0	0	0	0	0
70	0	0	2	0	0	0	0	0	0	0	0	0	0	0	0	0	0	0	0	0	0	0	0	0	2	0	0	0	0	0	0	0	0
85	0	0	2	0	0	0	0	0	0	0	0	0	0	2	0	0	0	0	0	0	0	0	0	0	2	0	0	0	0	0	0	0	0
100	0	4	4	2	0	0	2	0	0	0	2	0	4	4	0	0	0	0	0	0	0	0	0	0	4	0	2	0	0	0	0	0	0
120	0	4	4	6	6	0	2	4	0	0	2	0	4	4	6	6	0	2	4	0	0	2	0	4	4	0	4	0	0	0	0	0	0
150	0	4	4	8	8	2	4	6	0	2	4	0	4	4	8	8	2	4	6	0	2	4	0	4	4	4	6	0	2	0	0	0	2
175	2	4	4	8	8	6	4	6	2	6	4	0	4	4	8	8	6	4	6	2	6	4	0	4	4	6	6	2	4	2	0	2	4
200	2	4	4	10	10	8	4	8	6	8	4	2	4	4	10	10	8	2	8	6	8	2	2	4	4	8	8	4	4	8	4	4	4
250	6	4	6	12	14	10	4	8	6	10	4	6	4	6	12	14	10	4	8	6	10	4	6	4	6	10	10	8	4	8	6	8	4
300	6	6	6	16	16	12	6	10	8	12	6	6	6	6	14	16	12	4	10	8	12	4	6	6	6	12	14	12	4	8	8	12	4
350	8	6	8	18	18	14	6	12	8	14	6	8	6	8	18	18	14	6	12	8	14	6	8	6	8	16	18	14	6	10	8	14	6
400	8	8	10	22	22	18	6	14	8	18	6	8	8	10	22	22	18	6	12	8	18	6	8	8	10	18	20	18	6	12	8	18	6

## Sheet: Glut Rin
Glut-Con	Glut-GOF	SST-GOF
156	155	159
166	164	157
126	125	117
129	128	121
61	60	58
177	177	172
128	128	117
186	186	178
155	154	146
187	187	179

## Sheet: Glut Rheo
Glut-Con	Glut-GOF	SST-GOF
95	100	135
110	115	155
85	90	105
100	105	135
195	195	205
125	130	140
100	105	130
90	95	110
140	145	175
130	135	170
