# Supplementary material for: Heterozygous expression of a Kcnt1 gain-of-function variant has differential effects on somatostatin- and parvalbumin-expressing cortical GABAergic neurons
Source: eLife. 2024 Oct 11;13:RP92915. doi: 10.7554/eLife.92915 (PMC11469685; doi:10.7554/eLife.92915)
Supplement: Figure 6—source data 1. [file elife-92915-fig6-data1.xlsx]

## Sheet: VIP AP freq
Current (pA)	Con 40 mM										GOF 35 mM										GOF 30 mM
0	0	0	0	0	0	0	0	0	0	0	0	0	0	0	0	0	0	0	0	0	0	0	0	0	0	0	0	0	0	0
50	0	0	0	0	0	0	0	0	0	0	0	0	0	0	0	0	0	0	0	0	0	0	0	0	0	0	0	0	0	0
80	0	4	6	0	6	14	0	6	0	0	0	4	6	0	6	14	0	6	0	0	0	4	6	0	4	14	0	4	0	0
90	6	6	8	0	8	18	0	8	6	6	6	6	8	0	6	18	0	8	4	6	4	6	8	0	8	18	0	8	4	4
100	14	6	8	10	12	20	0	12	14	12	14	6	8	8	12	20	0	12	14	12	14	6	8	8	10	20	0	10	14	12
110	14	6	10	12	12	22	18	12	14	12	14	6	10	12	12	22	16	12	14	12	14	6	10	12	12	22	14	12	14	12
120	14	8	10	14	12	24	18	12	14	14	14	8	10	14	12	24	18	12	14	12	14	8	10	14	14	24	16	14	14	12
140	18	8	10	18	16	28	18	16	18	16	18	8	10	18	16	28	18	16	18	16	18	8	10	18	16	28	18	16	18	16
160	20	10	10	18	16	30	20	16	20	18	20	10	10	18	16	30	20	16	20	18	20	10	10	18	16	30	20	16	20	18
180	22	10	10	22	18	34	22	18	22	18	22	10	10	22	18	34	22	18	22	20	22	10	10	22	18	34	22	18	22	20
200	24	10	14	22	20	36	22	20	24	22	24	10	14	22	20	36	22	20	24	22	22	10	14	22	20	36	22	20	22	20

## Sheet: VIP Rin
40 mM	35 mM	30 mM
184	184	184
331	331	330
478	476	473
170	170	168
256	256	254
299	299	299
221	220	218
273	273	272
236	236	234
217	217	216

## Sheet: VIP Rheo
40 mM	30 mM	35 mM
90	90	90
70	75	72
59	60	59
96	97	96
83	84	83
73	74	73
86	89	87
68	71	69
74	76	74
88	88	88

## Sheet: SST AP freq
Current (pA)	Con 40 mM										GOF 35 mM										GOF 30 mM
0	0	0	0	0	0	0	0	0	0	0	0	0	0	0	0	0	0	0	0	0	0	0	0	0	0	0	0	0	0	0
40	0	0	0	0	0	0	0	0	0	0	0	0	0	0	0	0	0	0	0	0	0	0	0	0	0	0	0	0	0	0
60	0	0	0	0	0	0	0	0	0	0	0	0	0	0	0	0	0	0	0	0	0	0	0	0	0	0	0	0	0	0
80	0	0	2	0	0	0	0	0	0	0	0	0	0	0	0	0	0	0	0	0	0	0	0	0	0	0	0	0	0	0
100	0	0	14	0	0	0	2	0	0	0	0	0	0	0	0	0	0	0	0	0	0	0	0	0	0	0	0	0	0	0
120	2	0	18	0	2	0	2	0	0	2	0	0	16	0	0	0	2	0	0	0	0	0	0	0	0	0	0	0	0	0
140	8	2	20	0	24	2	6	2	0	24	0	0	18	0	2	0	2	0	0	2	0	0	2	0	0	0	2	0	0	0
160	8	4	22	2	30	6	8	2	0	30	6	0	20	0	6	0	4	0	0	26	0	0	4	0	2	0	2	0	0	2
180	10	14	24	24	36	18	10	10	2	34	8	0	22	10	10	2	6	2	0	30	6	0	8	0	2	0	2	0	0	4
200	12	18	26	34	42	14	10	14	26	36	10	2	24	22	18	2	14	2	0	34	8	0	14	2	10	2	2	2	0	28
225	14	36	28	40	48	20	12	28	36	42	10	2	26	28	26	16	18	10	18	38	10	2	24	10	18	2	4	2	0	32
250	14	40	30	44	52	30	12	38	42	44	12	2	28	36	34	22	22	22	30	42	10	2	26	20	26	10	6	4	2	36
300	14	52	32	54	60	46	14	50	52	50	14	10	32	50	50	34	28	40	44	48	12	10	28	36	38	26	8	30	34	44

## Sheet: SST Rin
40 mM	35 mM	30 mM
289	278	251
173	147	133
219	215	201
133	130	120
155	145	130
348	323	303
268	262	258
129	119	109
168	165	163
221	215	203

## Sheet: SST Rheo
40 mM	35 mM	30 mM
120	160	180
140	200	225
160	180	200
120	140	160
140	180	225
80	110	140
140	180	200
180	225	250
100	110	130
120	140	160

## Sheet: PV AP freq
Current (pA)	Con 40 mM										GOF 35 mM										GOF 30 mM
50	0	0	0	0	0	0	0	0	0	0	0	0	0	0	0	0	0	0	0	0	0	0	0	0	0	0	0	0	0	0
200	0	0	0	0	0	0	0	0	0	0	0	0	0	0	0	0	0	0	0	0	0	0	0	0	0	0	0	0	0	0
225	0	0	0	0	0	0	0	0	0	2	0	0	0	0	0	0	0	0	0	0	0	0	0	0	0	0	0	0	0	0
250	0	4	6	0	0	4	0	16	0	4	0	0	2	0	0	2	0	14	0	2	0	0	2	0	0	0	0	14	0	2
275	0	22	26	6	2	18	0	36	2	14	0	10	24	2	0	14	0	32	0	10	0	0	14	0	0	14	0	30	2	6
300	14	34	38	20	18	26	8	44	18	26	6	14	36	16	14	22	4	44	18	20	6	2	30	6	6	18	0	44	18	14
325	30	40	42	32	34	42	22	50	34	38	28	34	42	26	32	34	20	52	36	32	22	14	40	18	14	22	10	50	34	24
350	38	52	48	38	40	48	34	58	44	46	36	42	46	34	38	42	32	56	44	40	34	20	44	22	26	30	28	56	42	32
400	48	62	58	48	48	56	48	66	58	54	48	58	56	46	46	50	48	64	58	52	46	50	54	38	38	42	46	64	56	48
500	66	76	70	60	60	74	64	80	78	70	64	74	70	56	56	70	64	80	76	68	62	70	68	50	50	62	62	80	76	64
600	78	86	80	70	70	84	76	92	90	82	78	84	80	68	68	82	76	92	90	80	76	80	78	66	64	80	74	92	90	78
750	94	102	98	86	84	102	96	100	98	100	92	100	98	86	84	100	94	100	98	96	92	96	98	84	80	96	94	100	98	94

## Sheet: PV Rin
40 mM	35 mM	30 mM
66	66	65
149	149	145
101	101	97
111	111	110
82	82	81
121	120	118
116	115	112
99	99	97
86	85	83
127	127	125

## Sheet: PV Rheo
40 mM	35 mM	30 mM
295	300	325
235	245	250
290	300	325
240	240	250
280	290	275
250	250	255
250	260	270
265	275	280
250	250	260
225	235	240
