# Supplementary material for: Heterozygous expression of a Kcnt1 gain-of-function variant has differential effects on somatostatin- and parvalbumin-expressing cortical GABAergic neurons
Source: eLife. 2024 Oct 11;13:RP92915. doi: 10.7554/eLife.92915 (PMC11469685; doi:10.7554/eLife.92915)
Supplement: Figure 7—figure supplement 1—source data 1. [file elife-92915-fig7-figsupp1-data1.xlsx]

## Sheet: WT GABA
Time (s)	IKNa					INaP
-12	1	0.978564			0.949938	1	1			0.983051	0.921053	1
-6	0.960096	0.989007	0.938261	0.912642	0.986981	0.994848	0.954907	1	1	1	1	0.94
0	0.978242	1	0.938261	1	1	0.927019	0.923276	0.982456	1	0.881356	0.868421	0.86
6	0.978378	0.975583	0.987656	0.681954	0.90898	0.19989	0.144712	0	0	0.220339	0.157895	0.22
12	0.929375	0.86389	1	0.55474	0.823746	0.0191069	0.00182334	0	0	0	0	0
18	0.876398	0.800654	0.728399	0.406326	0.647294	0	0	0	0	0	0	0
24	0.684811	0.594532	0.555546	0.257912	0.256382	0	0	0	0	0	0	0
30	0.428753	0.345122	0.444454	0.173096	0.0363342	0	0	0	0	0	0	0
36	0.264038	0.18105	0.33334	0.173096	0	0	0	0	0	0	0	0
42	0.181758	0.136425	0.271601	0.109498	0	0	0	0	0	0	0	0
48	0.0974879	0.0483535	0.148144	0.0246823	0	0	0	0	0	0	0	0
54	0.0401399	0.0294493	0.111113	0.0164549	0	0	0	0	0	0	0	0
60	0	0.0150204	0.0370521	0	0	0	0	0	0	0	0	0

## Sheet: WT SST
Time (s)	IKNa							INaP
-12	0.962997	0.995471	0.876217	0.949549	0.968169	0.99978	0.951931	0.898204	0.905172	0.92	0.875	1
-6	0.921158	0.99672	1	1	1	1	1	1	0.948276	1	1	0.882353
0	0.949869	0.9876	0.995169	0.961142	0.969876	0.986641	0.95788	0.946108	1	0.933333	0.925	0.823529
6	1	1	0.980641	0.969711	0.981959	0.915912	0.905802	0	0	0	0	0
12	0.863504	0.913366	0.848068	0.831691	0.983156	0.718272	0.762022	0	0	0	0	0
18	0.699601	0.961097	0.718982	0.662283	0.691664	0.572926	0.582245	0	0	0	0	0
24	0.445877	0.737026	0.626435	0.593731	0.517627	0.507471	0.506086	0	0	0	0	0
30	0	0.4748	0.440469	0.405123	0.118325	0.377329	0.393168	0	0	0	0	0
36	0	0.346922	0.341457	0.235119	0.0184038	0.243057	0.291488	0	0	0	0	0
42	0	0.280535	0.273718	0.207167	0	0.163803	0.232059	0	0	0	0	0
48	0	0.174555	0.170384	0.140906	0	0.175778	0.219755	0	0	0	0	0
54	0	0.110721	0.140818	0.135499	0	0.092591	0.173961	0	0	0	0	0
60	0	0.0793413	0.0572425	0.12803	0	0.0987212	0.143597	0	0	0	0	0

## Sheet: WT PV
Time (s)	IKNa					INaP
-12	1	1	0.790159	1	1	1	0.954023	0.775758	0.931034	0.796748
-6	0.926863	0.813051	0.771034	0.897628	1	0.926941	0.873563	0.890909	1	1
0	0.934138	0.89867	0.88831	0.815641	0.975454	0.972603	1	1	0.956897	0.878049
6	0.95426	0.687765	0.988036	0.737691	0.912238	0	0	0.29697	0.301724	0.154472
12	0.824722	0.704252	1	0.697212	0.650427	0	0	0.0909091	0.0431034	0
18	0.598266	0.944785	0.954232	0.439533	0.517331	0	0	0	0	0
24	0.479428	0.954865	0.435853	0.410583	0.400781	0	0	0	0	0
30	0.380237	0.56097	0.319972	0.25248	0.328663	0	0	0	0	0
36	0.327184	0	0.158427	0.168849	0.245317	0	0	0	0	0
42	0.187594	0	0	0.0503975	0.117878	0	0	0	0	0
48	0.0958139	0	0	0.0174664	0.0181424	0	0	0	0	0
54	0.0592742	0	0	0	0	0	0	0	0	0
60	0	0	0	0.0499502	0.0445968	0	0	0	0	0

## Sheet: YH-HET PV
Time (s)	IKNa				INaP
-12	1	0.96778	0.988296	1	1	1	0.981818	0.942857
-6	0.950731	0.96778	1	0.943875	0.97541	1	0.972727	0.8
0	0.932119	1	0.932859	0.928941	0.986339	1	1	1
6	0.808976	0.947897	0.965599	0.879051	0.0355191	0	0.35	0.114286
12	0.768026	0.903037	0.911032	0.784935	0	0	0	0.0714286
18	0.458891	0.668214	0.887299	0.410232	0	0	0	0
24	0.350665	0.445068	0.435469	0.161114	0	0	0	0
30	0.275644	0.281467	0.431578	0.0667925	0	0	0	0
36	0.227662	0.11525	0.399249	0	0	0	0	0
42	0.178266	0.0524853	0.382744	0.00939526	0	0	0	0
48	0.120487	0.0188891	0.246872	0.00939526	0	0	0	0
54	0	0.0158691	0.122112	0.00939526	0	0	0	0
60	0	0	0	0.00939526	0	0	0	0
