# Supplementary material for: Heterozygous expression of a Kcnt1 gain-of-function variant has differential effects on somatostatin- and parvalbumin-expressing cortical GABAergic neurons
Source: eLife. 2024 Oct 11;13:RP92915. doi: 10.7554/eLife.92915 (PMC11469685; doi:10.7554/eLife.92915)
Supplement: Figure 7—figure supplement 2—source data 1. [file elife-92915-fig7-figsupp2-data1.xlsx]

## Sheet: Rin
PV 35	PV 30	PV 35 INaP	PV 30 INaP
0	-1.51515	0	-1.51515
0	-2.68456	-0.671141	-2.68456
0	-3.9604	-2.9703	-2.9703
0	-0.900901	-0.900901	-0.900901
0	-1.21951	0	-1.21951
-0.826446	-2.47934	-1.65289	-2.47934
-0.862069	-3.44828	-1.72414	-3.44828
0	-2.0202	0	-2.0202
-1.16279	-3.48837	-1.16279	-2.32558
0	-1.5748	-1.5748	-2.3622

## Sheet: Rheo
PV 35	PV 30	PV 30 INaP	PV 35 INaP
1.69492	10.1695	-8.47458	-3.38983
4.25532	6.38298	-4.25532	-2.12766
3.44828	12.069	-6.89655	-3.44828
0	4.16667	-4.16667	-2.08333
3.57143	-1.78571	-8.92857	-3.57143
0	2	-12	-4
4	8	-8	0
3.77358	5.66038	-9.43396	-3.77358
0	4	-8	-4
4.44444	6.66667	-4.44444	-2.22222

## Sheet: AP firing rate
PV 35	PV 30	PV 30 INaP	PV 35 INaP
-6.66667	-26.6667	13.3333	0
-15	-65	30	20
0	-4.7619	9.52381	0
-18.75	-43.75	18.75	18.75
-5.88235	-58.8235	17.6471	17.6471
-19.0476	-47.619	19.0476	19.0476
-9.09091	-54.5455	27.2727	-9.09091
4	0	4	4
5.88235	0	17.6471	11.7647
-15.7895	-36.8421	15.7895	5.26316
