# Supplementary material for: Heterozygous expression of a Kcnt1 gain-of-function variant has differential effects on somatostatin- and parvalbumin-expressing cortical GABAergic neurons
Source: eLife. 2024 Oct 11;13:RP92915. doi: 10.7554/eLife.92915 (PMC11469685; doi:10.7554/eLife.92915)
Supplement: Figure 7—source data 1. [file elife-92915-fig7-data1.xlsx]

## Sheet: SST INaP
	WT			YH-HET
Voltage (mV)	Mean	SEM	N	Mean	SEM	N
-80	0.003592	0.01616	23	-0.002361	0.01568	19
-75	0.01796	0.02317	23	-0.01055	0.01619	19
-70	0.01216	0.01943	23	-0.004489	0.01503	19
-65	0.000123	0.01537	23	-0.01104	0.01371	19
-60	-0.01386	0.0172	23	-0.01686	0.01561	19
-55	-0.04546	0.01769	23	-0.02471	0.01783	19
-50	-0.09613	0.02814	23	-0.07568	0.02312	19
-45	-0.1938	0.03837	23	-0.1476	0.03518	19
-40	-0.3476	0.05457	23	-0.2896	0.05823	19
-35	-0.5283	0.06819	23	-0.4507	0.06972	19
-30	-0.7045	0.07995	23	-0.6365	0.0862	19
-25	-0.7911	0.0827	23	-0.7535	0.0879	19
-20	-0.7979	0.08613	23	-0.728	0.08173	19
-15	-0.7475	0.091	23	-0.6652	0.08119	19
-10	-0.6423	0.08866	23	-0.5301	0.08209	19
-5	-0.5453	0.08957	23	-0.3983	0.097	19
0	-0.4297	0.1054	23	-0.2554	0.1107	19

## Sheet: SST peak INaP
WT	YH-HET
-1.38	-1.61
-0.92	-0.84
-1.18	-1.1
-0.93	-0.82
-0.95	-0.67
-1.53	-0.51
-0.73	-0.49
-0.37	-0.78
-0.37	-0.56
-0.45	-0.48
-1.09	-0.94
-0.8	-0.44
-0.81	-1.31
-0.86	-0.83
-0.75	-0.75
-0.66	-1.68
-0.38	-0.46
-1.07	-0.63
-0.48	-1.07
-0.64
-0.92
-1.29
-0.99

## Sheet: PV INaP
	WT			YH-HET
Voltage (mV)	Mean	SEM	N	Mean	SEM	N
-80	-0.02787	0.01916	14	-0.0681	0.0364	15
-75	-0.03531	0.02276	14	-0.0569	0.0521	15
-70	-0.01056	0.02751	14	-0.0527	0.0253	15
-65	-0.0281	0.01858	14	-0.07069	0.0383	15
-60	-0.05445	0.02044	14	-0.1002	0.0262	15
-55	-0.06891	0.02159	14	-0.1584	0.0354	15
-50	-0.1179	0.02341	14	-0.2512	0.0603	15
-45	-0.2243	0.03048	14	-0.3812	0.1004	15
-40	-0.3349	0.04717	14	-0.6859	0.1723	15
-35	-0.4887	0.06824	14	-1.081	0.252	15
-30	-0.67	0.09049	14	-1.434	0.3035	15
-25	-0.876	0.1156	14	-1.742	0.3049	15
-20	-1.049	0.1403	14	-1.916	0.2989	15
-15	-1.151	0.1645	14	-1.929	0.2823	15
-10	-1.205	0.1703	14	-1.859	0.3202	15
-5	-1.163	0.149	14	-1.785	0.3394	15
0	-1.011	0.148	14	-1.587	0.333	15

## Sheet: PV peak INaP
WT	YH-HET
-0.97	-2.03
-0.98	-1.5
-1.42	-2.34
-0.55	-2.46
-2.24	-2.01
-2.58	-2.54
-1.33	-2.3
-2.05	-1.39
-1.94	-1.97
-1.22	-1.63
-0.81	-3.6
-0.92	-4.47
-1.17	-1.11
-1.63	-1.29
	-1.44

## Sheet: PV AP freq
Current (pA)	Con										GOF+INaP
50	0	0	0	0	0	0	0	0	0	0	0	0	0	0	0	0	0	0	0	0
200	0	0	0	0	0	0	0	0	0	0	0	0	0	0	0	0	0	0	0	0
225	0	0	0	0	0	0	0	0	0	2	0	0	0	2	2	0	0	2	0	0
250	0	4	6	0	0	4	0	16	0	4	0	14	6	14	8	6	0	26	0	8
275	0	22	18	6	2	18	0	36	2	14	6	34	16	30	28	22	6	38	8	20
300	14	34	38	20	18	26	8	44	18	26	18	40	36	34	34	44	14	46	28	32
325	30	40	42	32	34	42	22	50	34	38	30	48	42	38	40	50	20	52	38	40
350	38	52	48	38	40	48	34	58	44	46	38	56	48	42	46	54	34	56	48	48
400	48	62	58	48	48	56	48	66	58	54	48	68	56	52	52	66	48	66	58	58
500	66	76	70	60	60	74	64	80	78	70	64	80	68	64	70	78	64	80	78	76
600	78	86	80	70	70	84	76	92	90	82	76	88	78	70	76	94	74	92	90	92
750	94	102	98	86	84	102	96	100	98	100	92	104	98	84	84	104	94	100	100	102

## Sheet: PV Rheo
Con	GOF+INaP
295	270
235	225
290	270
240	230
280	255
250	220
250	230
265	240
250	230
225	215
