# Supplementary material for: Heterozygous expression of a Kcnt1 gain-of-function variant has differential effects on somatostatin- and parvalbumin-expressing cortical GABAergic neurons
Source: eLife. 2024 Oct 11;13:RP92915. doi: 10.7554/eLife.92915 (PMC11469685; doi:10.7554/eLife.92915)
Supplement: Figure 8—source data 1. [file elife-92915-fig8-data1.xlsx]

## Sheet: SST connection strength
WT	YH-HET
3.84	1.84
3.82	2.34
7.29	0.82
0.29	1.04
33.88	2.31
1.99	0.4
2.78	2.69
	0.93
	5.52
	6.96
	6.77

## Sheet: sEPSC freq onto SST
WT	YH-HET
6.06	28.64
5.47	13.15
17.18	6.33
10.47	11.6
13.74	5.65
7.47	14.69
7.57	13.7
8.97	10.57
9.45	7.33
7.97	7.97
5.83	8
7.64	4.71
3.1	3.72
10.04	16.12
6.17	11.58
6.58	5.75
6.95	11.66
4.3	13.58
6.48	8
8	5.63
4.08	5.38
12.5	17.35
19.38	19.39
7.38	7.57
24.88	5.81
9.42	6.97
10.08	9.78
6.71	9.53
7.23	10.09
7.86	23.8
5.67	24.85
6.09	21.13
6.06	11.9
3.72	9.09
2.72	3.95
6.1	15.24
4.48	8.5
4.8	7.78
3.84	8
3.87	11.25
5.37	19.2
6.68	10.07
4.58	12.5
15.57	12.57
5.07	11.32
6.52	16.31
10.63	13.75
8.11	9.8
13.44	21.81
19.67	5.09
25.7	5.71
9.85	11.04
21.51	17.2
5.36	12.17
3.33	21.56
5.82	12.6
5.8	13.27
10.73	7.24
13.83	18.09
19.33	4.89
11.84	6.97
8.29	9.2
8.71	7.6
7	7.96
3.94	15.89
7.22	10.6
7.98	21.11
8.85	9.33
15.86	11.11
9.44	14.64
8.1	10.56
12.87	8.35
17.07
6.92
27.09
8.26
10.39
11.29
10.69
