# Supplementary material for: Heterozygous expression of a Kcnt1 gain-of-function variant has differential effects on somatostatin- and parvalbumin-expressing cortical GABAergic neurons
Source: eLife. 2024 Oct 11;13:RP92915. doi: 10.7554/eLife.92915 (PMC11469685; doi:10.7554/eLife.92915)
Supplement: Figure 9—source data 1. [file elife-92915-fig9-data1.xlsx]

## Sheet: APs per second
	WT		YH-HET
Current (pA)	Mean	SEM	Mean	SEM
0	0	0	0	0
10	1.125	0.40531	0.4167	0.32764
20	4.1667	0.893	1.913	0.68996
30	7.5417	1.20182	4.2083	1.01888
40	11.125	1.25736	6.913	1.36651
50	15.2917	1.47488	9.3333	1.56865
60	18.1667	1.52031	12.1667	1.7743
70	21.125	1.62694	14.2917	1.99694
80	23.3333	1.69933	16.375	2.089
90	25.75	1.8059	18.4167	2.21729
100	27.7917	1.75889	20.2917	2.27721
110	29.2083	1.90939	21.7917	2.37827
120	30.875	2.00634	23.5417	2.44664
130	32.0417	2.12089	24.375	2.47755
140	32.0417	2.40982	24.6667	2.53973
150	33.1667	2.5322	25.25	2.54013

## Sheet: Input Resistance
WT	YH-HET
732	425.667
693	206
421.667	280.5
380	448.667
533.333	434
420	335.667
726.667	627.667
377	703
666	527.667
410	361.667
242	236
740	151.667
311	288
503.333	490
306	283
229.667	245
519.333	450
310.333	314
271	329
455.333	320
236.667	301
406.333	262
295	462
422	166
239	207

## Sheet: Rheobase
WT	YH-HET
20	50
20	50
20	50
10	30
20	20
20	40
10	20
30	20
10	10
10	20
10	20
10	30
30	10
10	20
20	90
20	50
10	20
10	30
30	30
20	30
30	40
30	40
25	10
10	60
40	50

## Sheet: AP threshold
WT	YH-HET
-35.8	-42.36
-44.53	-43.8
-45.26	-39.43
-48.65	-47.67
-50.14	-45.68
-46.23	-44.34
-48.16	-46.57
-43.95	-49.35
-50.3	-48.45
-45.84	-41.29
-45.76	-41.67
-42.14	-48.39
-44.34	-53.53
-45.14	-45.2
-41.5	-34.62
-42.11	-47.6
-47.21	-44.3
-45.18	-42.8
-38.5	-43.2
-46.17	-42.3
-41.44	-36.6
-44.04	-45.8
-46	-50.5
-43.1	-47.8
-42.1	-42.7

## Sheet: AHP
WT	YH-HET
9.37	11.28
7.46	8.56
8	10.38
7.81	8.73
10.44	10.07
6.68	9.83
8.12	3.17
8.97	11.29
11.1	7.43
9.64	7.66
6.76	12.57
12.76	8.7
7.51	3.72
8.26	7.2
9.03	13.02
9.51	5
5	8
6	9.6
7.72	7
13.63	6.92
17.09	13.7
8.51	8.8
7.33	5.6
5.35	9.7
14.4	8.9
